# Supplementary material
Source: PubMed Central journal article supplement (PMC8409593)
Supplement: jci-131-140615-s074.pdf [file jci-131-140615-s074.pdf]

1 SUPPLEMENTAL FIGURES AND FIGURE LEGENDS

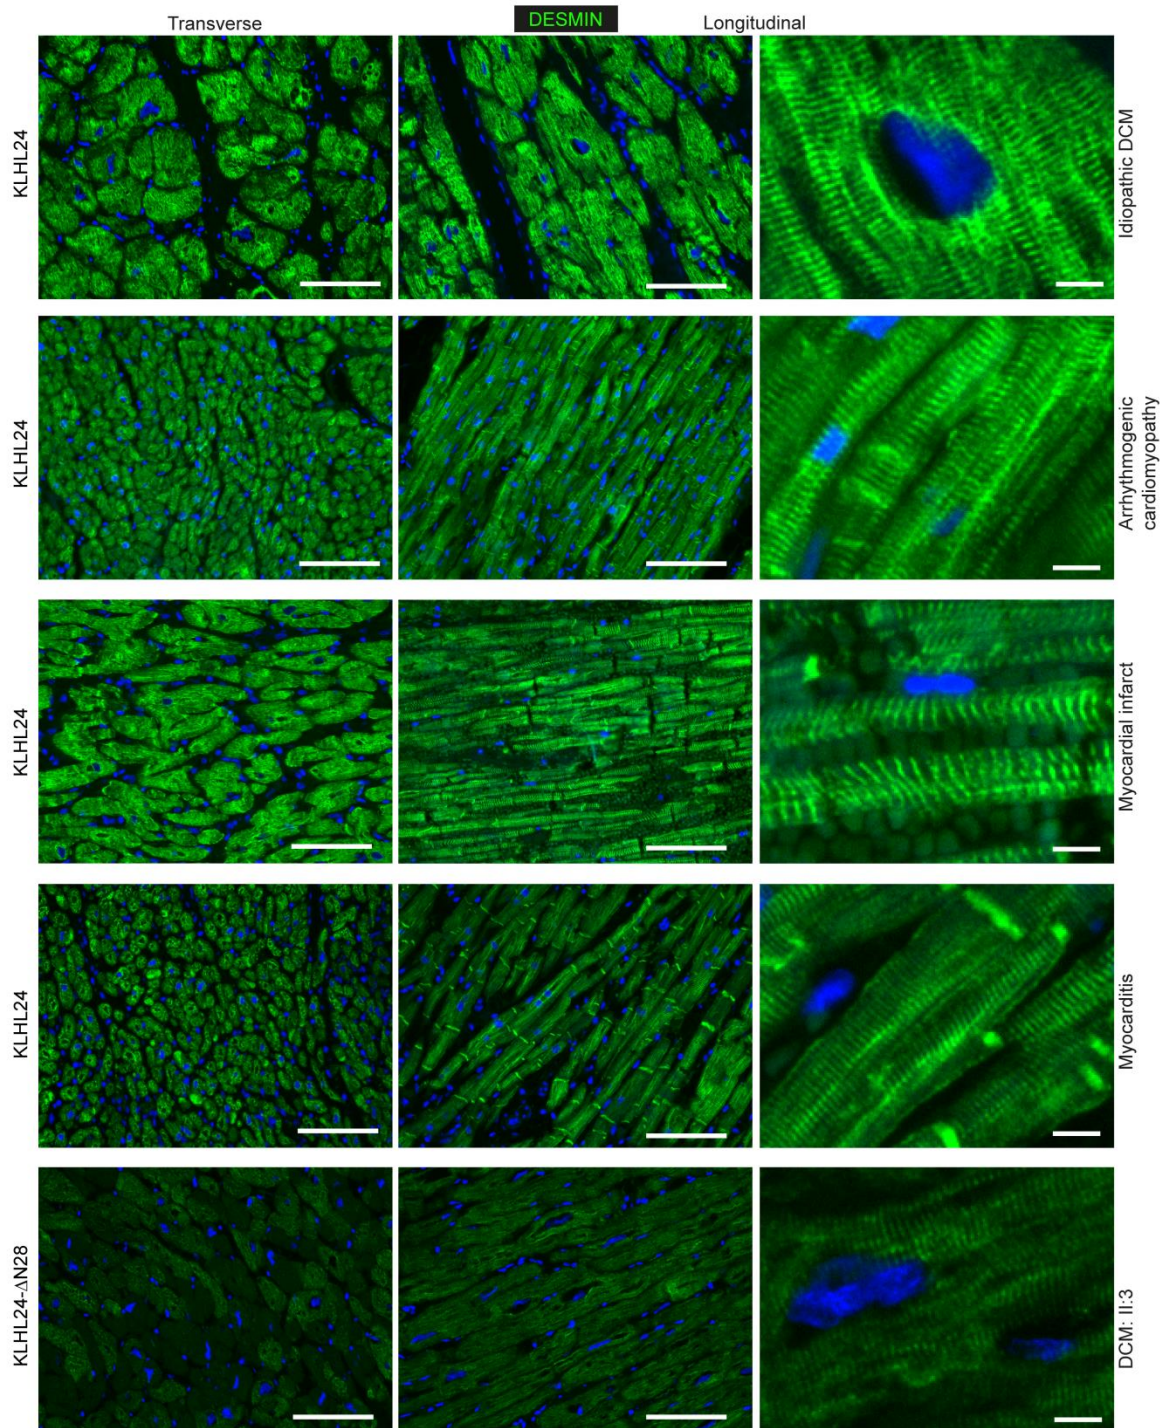

2  
3 **Supplemental Figure 1: Overview of all explanted heart stainings with desmin.** IFA of desmin in  
4 cardiomyocytes of human explanted hearts with heart failure of different etiologies including patient II:3, both in  
5 the transverse (left) and the longitudinal (middle) direction. Part of these images are also depicted in Figure 2A.  
6 These scales bars are 50  $\mu$ m. On the right, a zoom-in of the longitudinal section is depicted, showing the  
7 sarcomeric striations of desmin. These scale bars are 5  $\mu$ m.

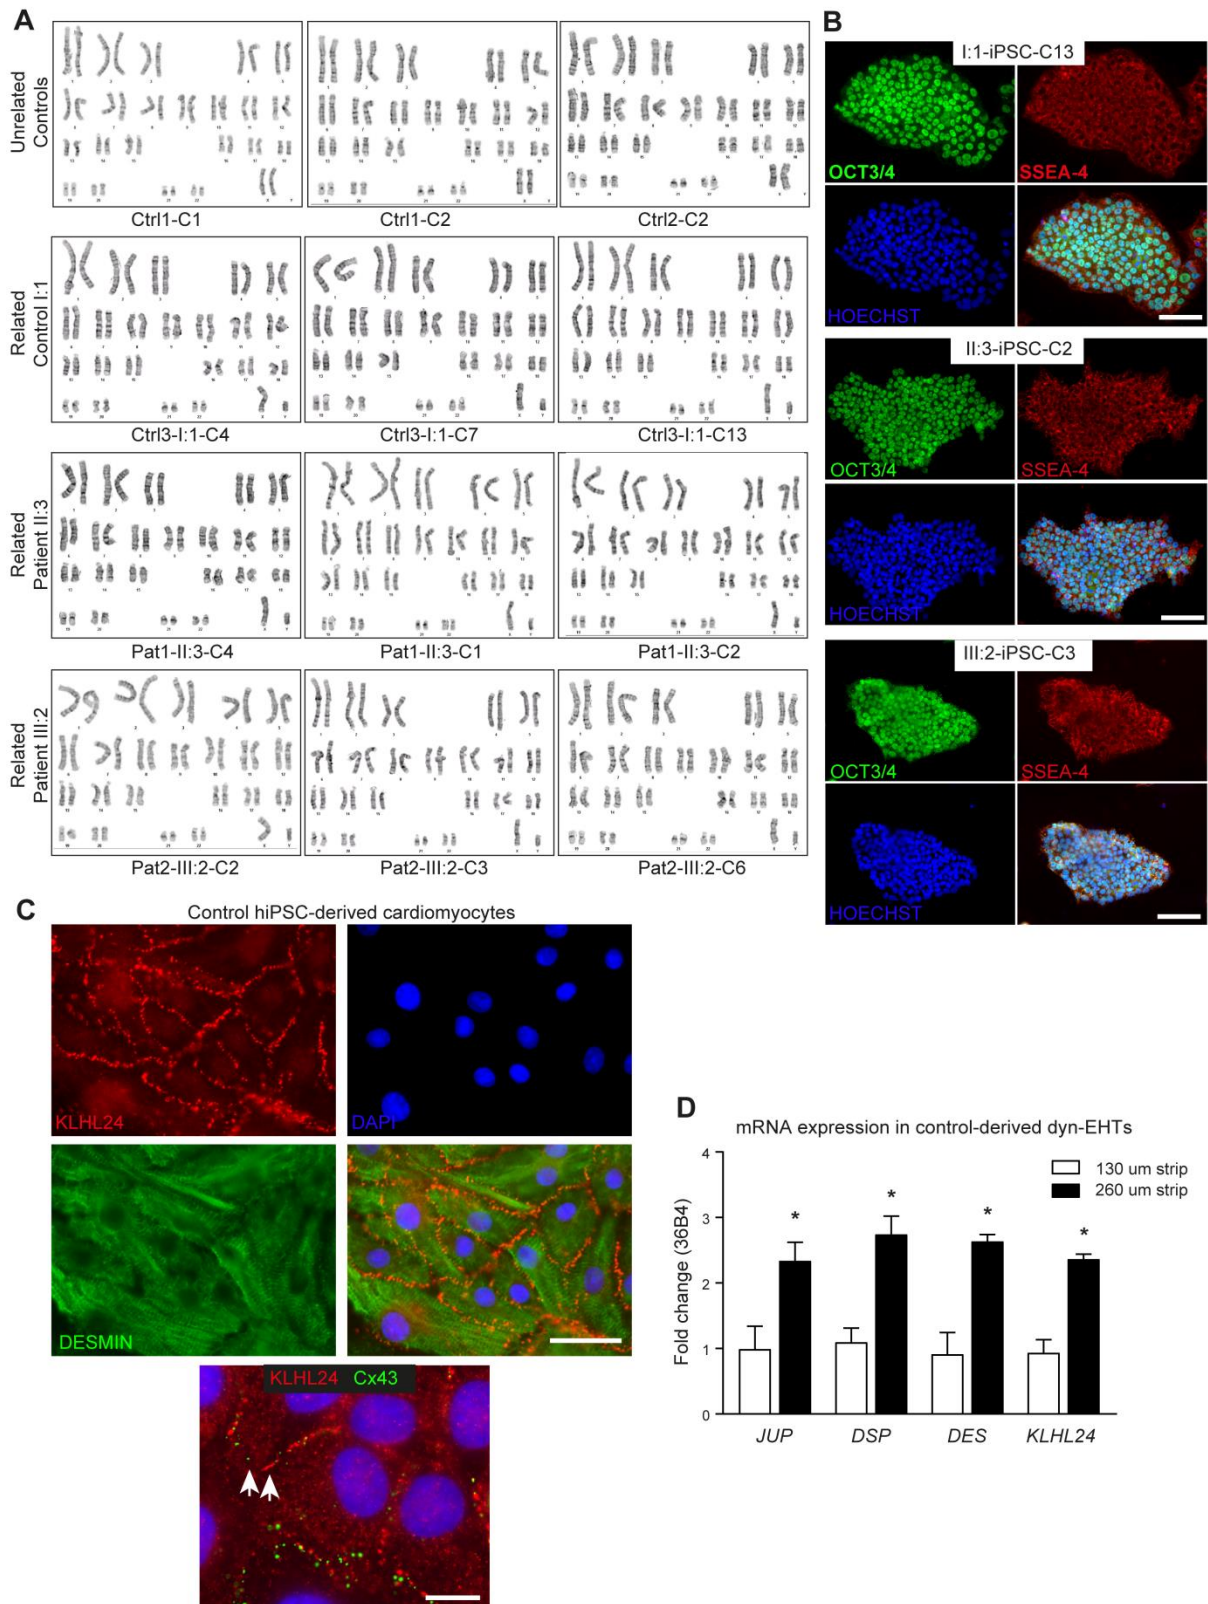

1

2 **Supplemental Figure 2: Validation of hiPSC lines and KLHL24 expression in control**  
 3 **cardiomyocytes/dyn-EHTs** **A)** Karyotype of all hiPSC lines used in this study. “C” stands for different clonal  
 4 lines. **B)** Representative IFA of pluripotent markers, OCT3/4 and SSEA-4 in hiPSC lines generated of the three

1 family members included in this study. Scale bars are 50  $\mu\text{m}$ . C) IFA shows co-labeling of KLHL24, desmin and  
2 Cx43 in 2D cultured control cardiomyocytes. Scale bars are 50  $\mu\text{m}$ . The arrows point towards their localization  
3 at the cell periphery where the scale bar is 10  $\mu\text{m}$ . D) mRNA expression of genes encoding plakoglobin (*JUP*),  
4 desmoplakin (*DSP*), desmin (*DES*) and KLHL24 (*KLHL24*) in control-derived dyn-EHTs loaded with 260 vs.  
5 130  $\mu\text{m}$  strips. n=3 tissues/group; \*p<0.05 (Mann Whitney U test compared to 130  $\mu\text{m}$  strip dyn-EHTs).

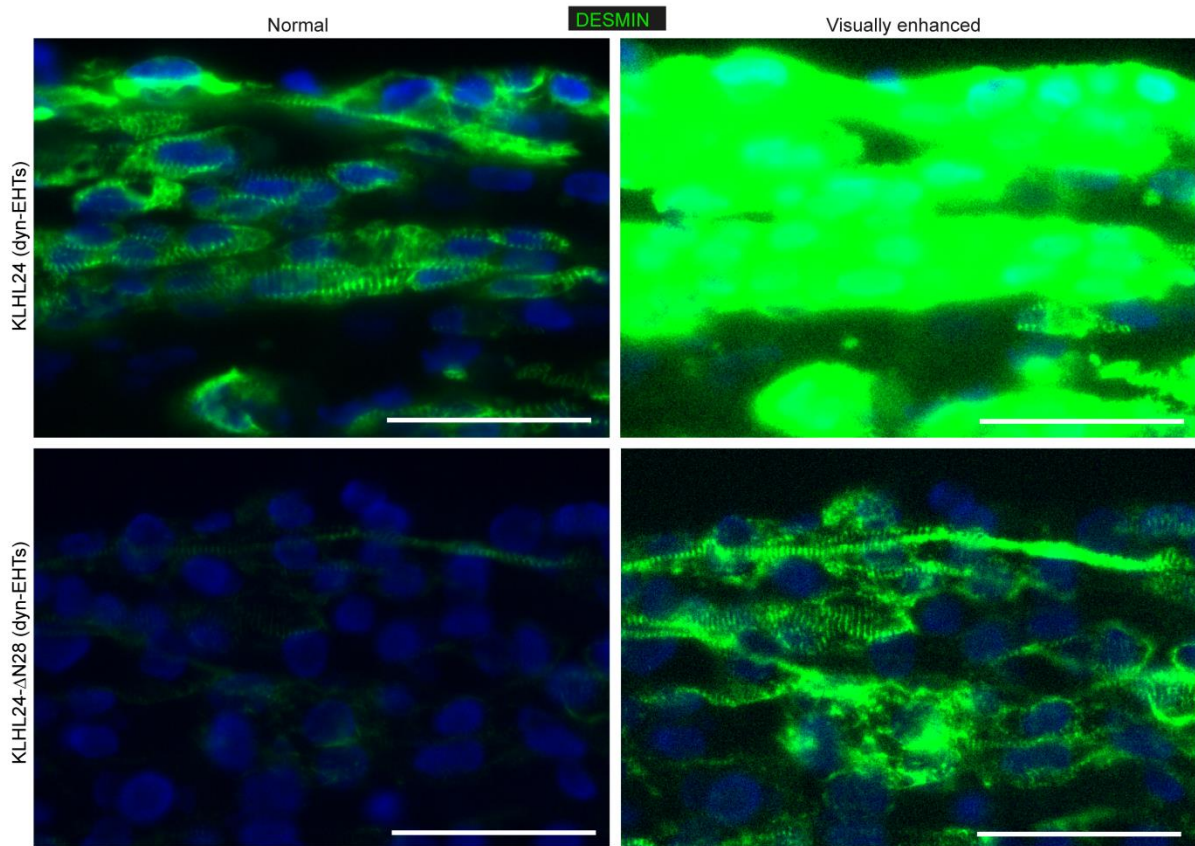

1

2 **Supplemental Figure 3: Desmin network assessment in dyn-EHTs.** IFA labeling of desmin in dyn-EHTs.

3 The left panel depicts zoom-in images of the desmin network where the upper image is representative for control  
 4 and the lower image for patient-derived dyn-EHTs. The right panel shows these same images, using the same  
 5 settings, but with visual enhancements (increased contrast and brightness). Now in patient-derived tissues, the  
 6 entire desmin network can be better observed and although it is 10-fold less extensive, the structure seems to be  
 7 well preserved. Scale bars are 50  $\mu\text{m}$ .

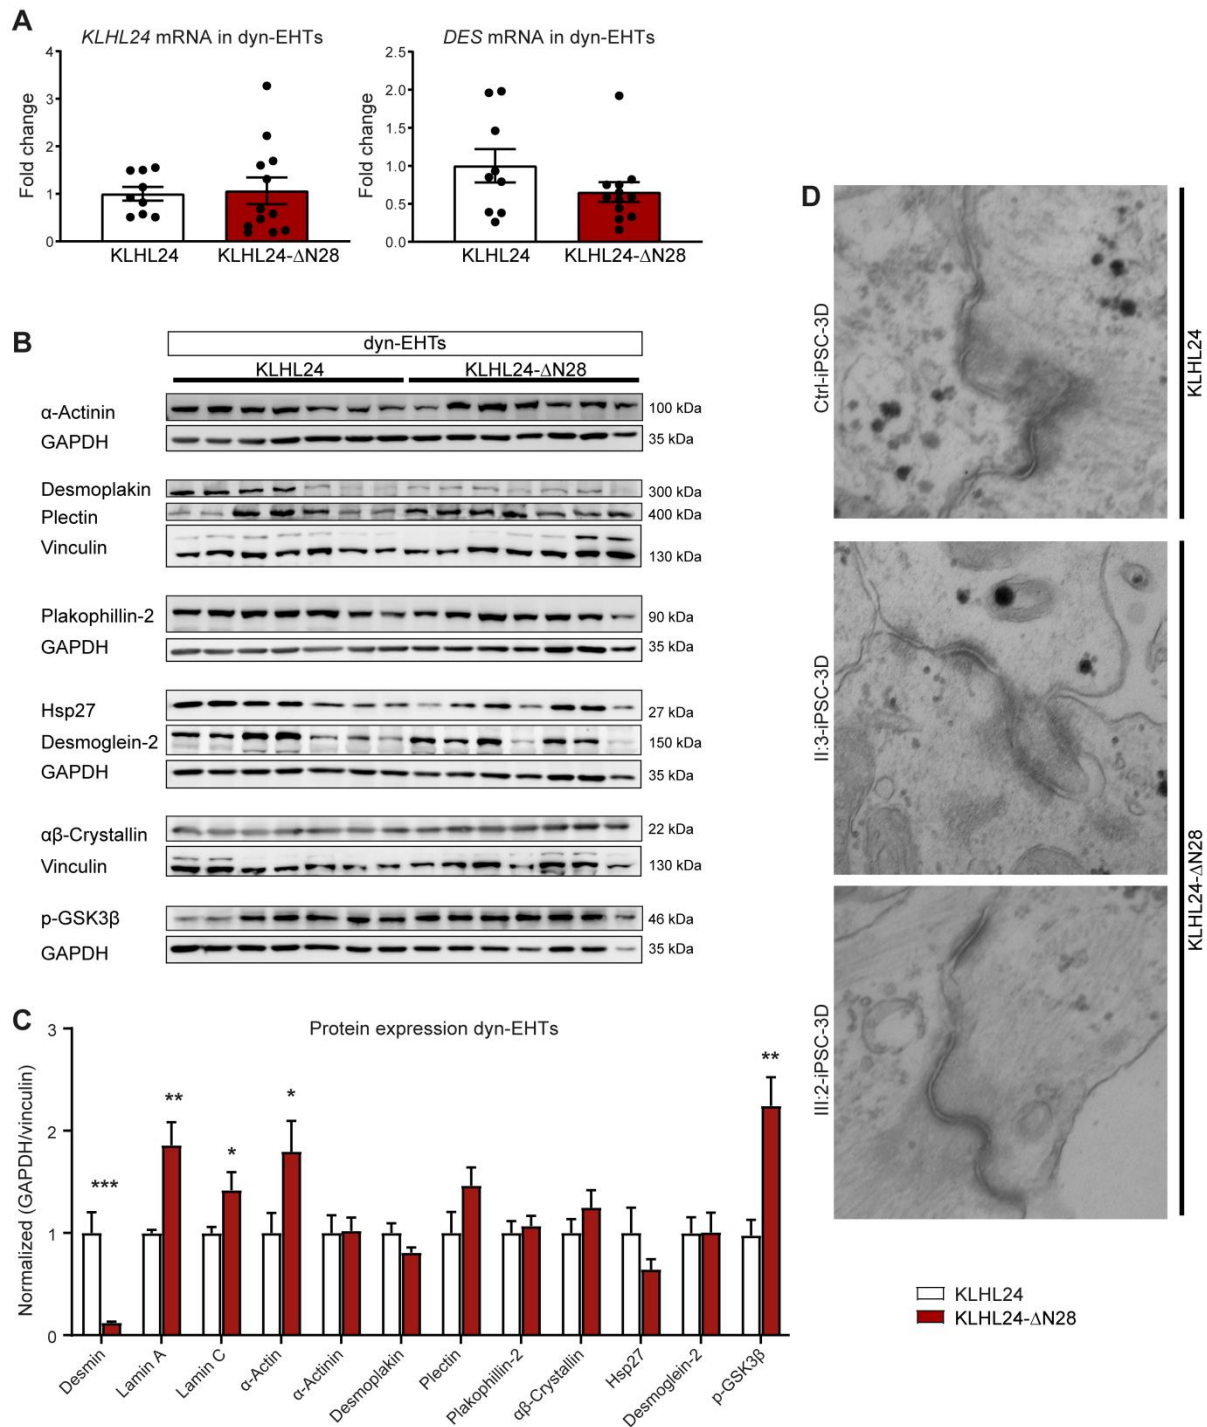

1

2 **Supplemental Figure 4: Analysis of patient-derived dyn-EHTs.**

3 **A)** mRNA expression of *KLHL24* and *DES* in patient compared to control-derived dyn-EHTs. (n=9 of control vs.  
 4 n=12 for patient-derived dyn-EHTs). **B)** Western blots of several cardiac markers, binding partners of desmin  
 5 and other desminopathy-associated proteins in dyn-EHTs. **C)** Quantified protein levels of blots depicted in panel  
 6 B and Figure 2, where some blots of panel B are derived from the same gels as Figure 2 (n=7 of control and  
 7 patient-derived dyn-EHTs). \*p<0.05; \*\*p<0.01; \*\*\*p<0.001; (unpaired *T*-test, between patient and control-

- 1 derived dyn-EHTs). **D)** Overview TEM images of control and patient-derived dyn-EHTs at day 28, emphasizing
- 2 normally preserved intercalated disc structures.
- 3

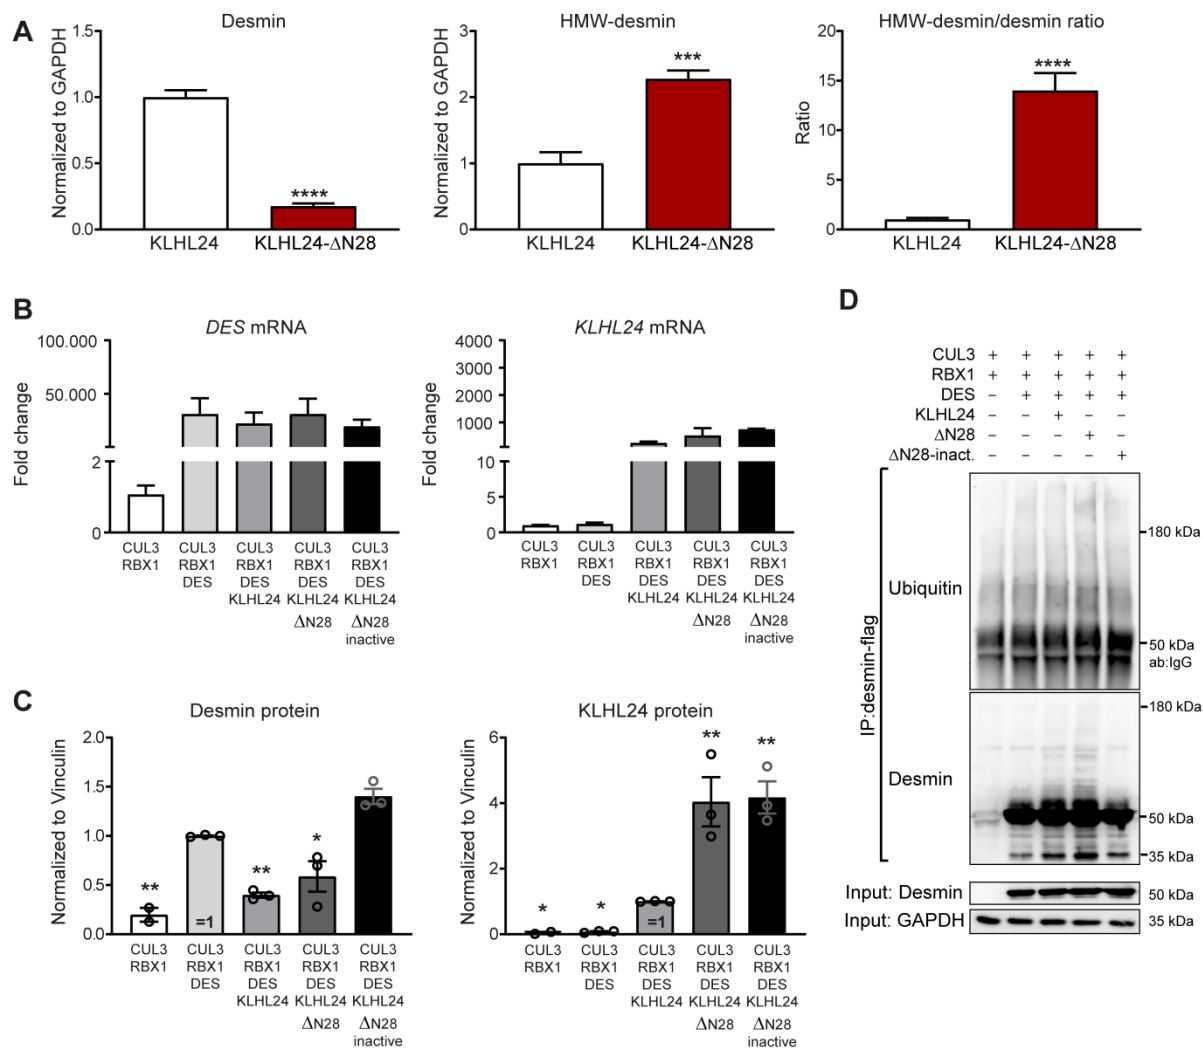

1

2 **Supplemental Figure 5: Desmin ubiquitination quantification in dyn-EHTs and additional data from**  
3 **HEK293A transfection studies.**

4 **A)** Quantification of desmin and high molecular weight (HMW) desmin protein levels, including their ratio, in  
5 dyn-EHTs. n=7/group; \*\*\*p<0.001 (Mann Whitney U test, compared to control-derived dyn-EHTs);  
6 \*\*\*\*p<0.0001 (Mann Whitney U test, compared to control-derived dyn-EHTs). **B)** mRNA expression of *DES*  
7 and *KLHL24*, 48 hours post-transfection of HEK-cells (n=3 experiments), (desmin:KLHL24> 1:1 transfection  
8 ratio). **C)** Quantified protein levels of desmin and KLHL24, 48 hours post-transfection of HEK-cells (n=3  
9 experiments), (desmin:KLHL24> 1:1 transfection ratio). Differences in transfection efficiency were normalized  
10 by setting the baseline of each experiment at 1. (“=1” in graph represents the baseline); \*p<0.05 (1-way ANOVA  
11 on desmin protein, compared to co-transfection of RBX1, CUL3 and DES);\*\*p<0.01 (compared to co-  
12 transfection of RBX1, CUL3 and DES); \*p<0.05 (1-way ANOVA on KLHL24 protein, compared to co-  
13 transfection of RBX1, CUL3, DES and KLHL24);\*\*p<0.01 (compared to co-transfection of RBX1, CUL3, DES

1 and KLHL24). **D)** Separate western blots of desmin (Y66; rabbit) and ubiquitin (FK2; mouse) on desmin  
2 immunoprecipitation fractions of transfected HEK293A cells, using a flag-tagged desmin plasmid (IP antibody  
3 anti-flag M2; mouse), (desmin:KLHL24> 5:1 transfection ratio). The input levels used for the IP are depicted  
4 below on a separate gel, containing desmin and GAPDH. ab IgG> refers to the heavy-chain band of to the  
5 antibody used for immunoprecipitation.



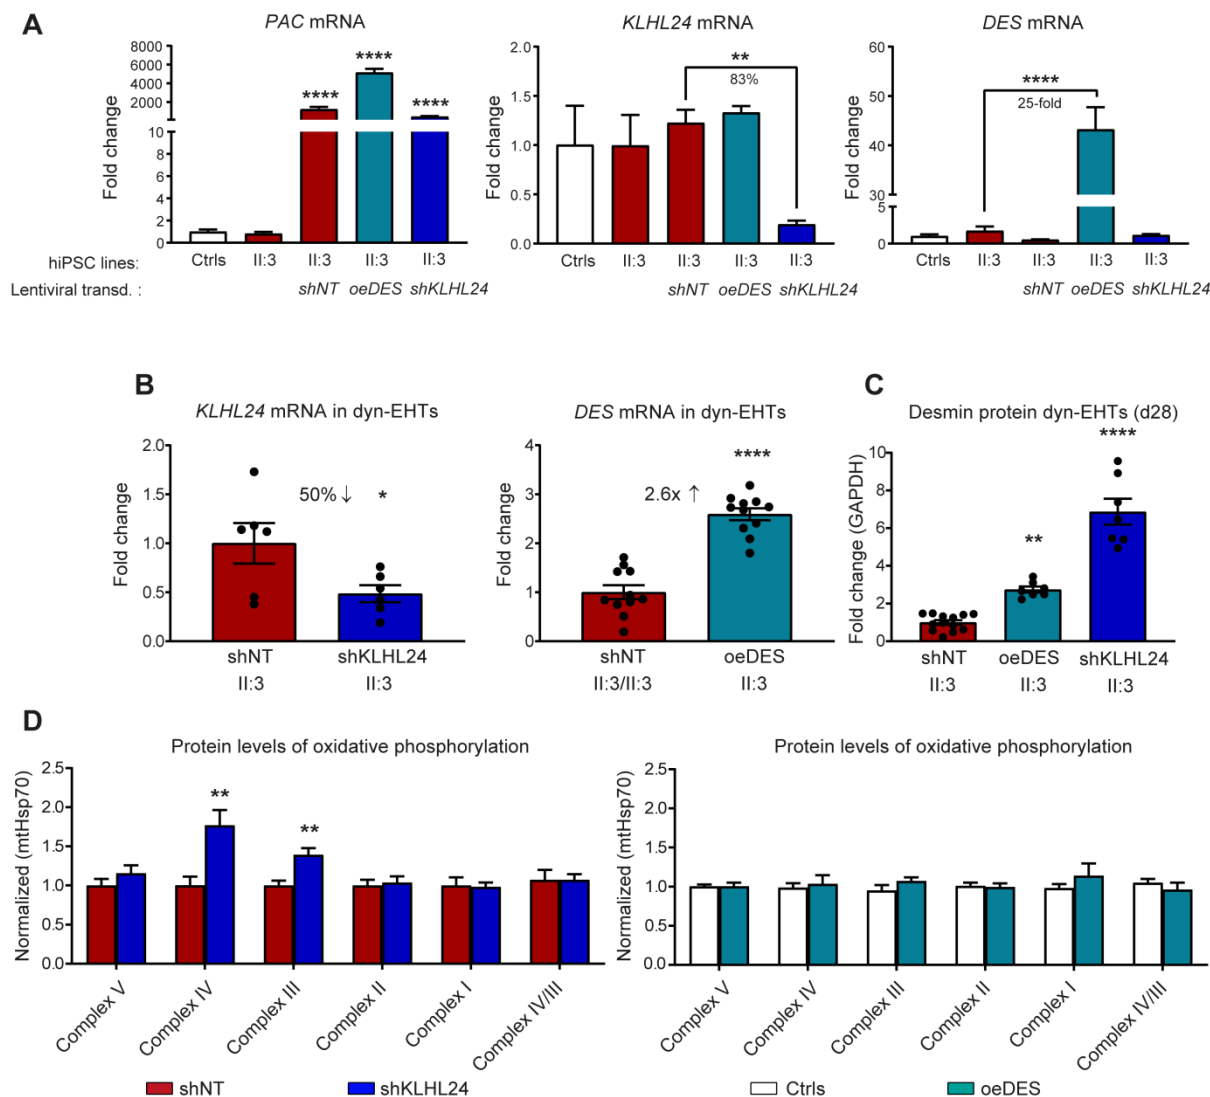

1

2 **Supplemental Figure 6: Quantified mRNA and protein levels in both rescue models**

3 **A)** mRNA expression of *PAC* (puromycin), *KLHL24* and *DES* in hiPSC after lentiviral transduction and

4 puromycin selection. (n=3/group); \*\*\*\*p<0.0001(1-way ANOVA of *PAC* expression, compared to both control

5 and non-transduced II:3 hiPSC); \*\*p<0.01 (Unpaired *T*-test, shKLHL24 vs. shNT-II:3-hiPSC); \*\*\*\*p<0.0001

6 (Unpaired *T*-test, oeDES-II:3 vs. non-transduced II:3-hiPSC); **B)** mRNA expression of *KLHL24* and *DES* in

7 dyn-EHTs at day 28. n=6 for II:3 and 6 for shNT-II:3 group; n=6 for shKLHL24-II:3 group; n=11 for oeDES-

8 II:3 group \*p<0.05 (Unpaired *T*-test); \*\*\*\*p<0.0001 (Unpaired *T*-test). **C)** Desmin protein levels measured in

9 dyn-EHTs at day 28. n=18 for shNT-II:3, II:3 and III:2 tissues combined, n=7 for oeDES and n=6 for

10 shKLHL24-II:3 tissues; \*\*p<0.01 (1-way ANOVA compared to shNT;II:3;III:2 patient-derived dyn-EHTs);

11 \*\*\*\*p<0.0001 (compared to shNT;II:3;III:2 patient-derived dyn-EHTs). **D)** Quantified protein levels of

12 OXPHOS complexes I-V in dyn-EHTs at day 28. n=7/group; \*\*p<0.01 (Unpaired *T*-test).

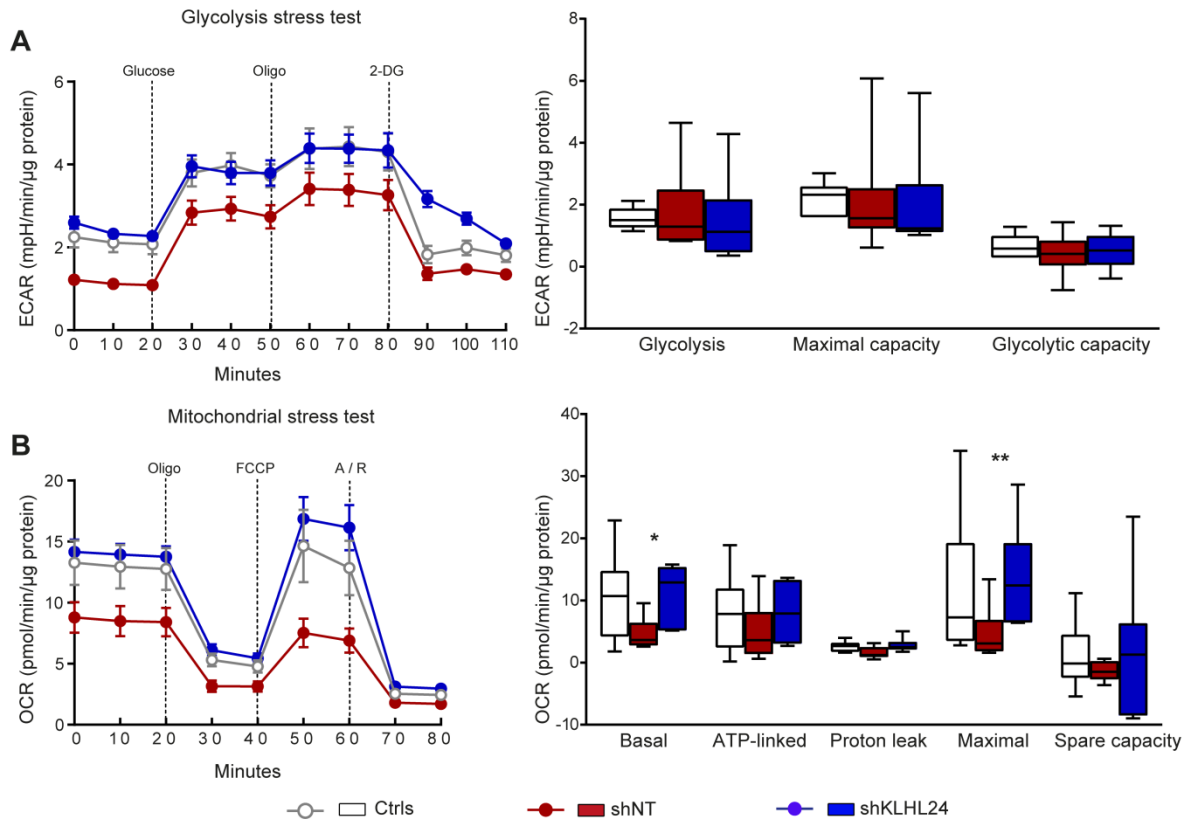

1

2 **Supplemental Figure 7: Seahorse analysis of patient-derived cardiomyocytes with RNAi of *KLHL24*.**

3 **A)** The graph on the left shows the extracellular acidification rate (ECAR) of cardiomyocytes measured during  
 4 the glycolysis stress test, depicted as collective data (n=7). The Ctrl reference is I:2-derived. The bar graph on  
 5 the right represents the different fractions summarized. **B)** The left graph shows the oxygen consumption rate  
 6 (OCR) measured during the mitochondrial stress test, depicted as collective data (n=7). The Ctrl reference is  
 7 familial I:2-derived. The right graph represents the different fractions summarized. \*p<0.05 (2-way ANOVA,  
 8 post-hoc Uncorrected Fishers LSD test shNT vs. shKLHL24 condition); \*\*p<0.01 (shNT and shKLHL24  
 9 condition).

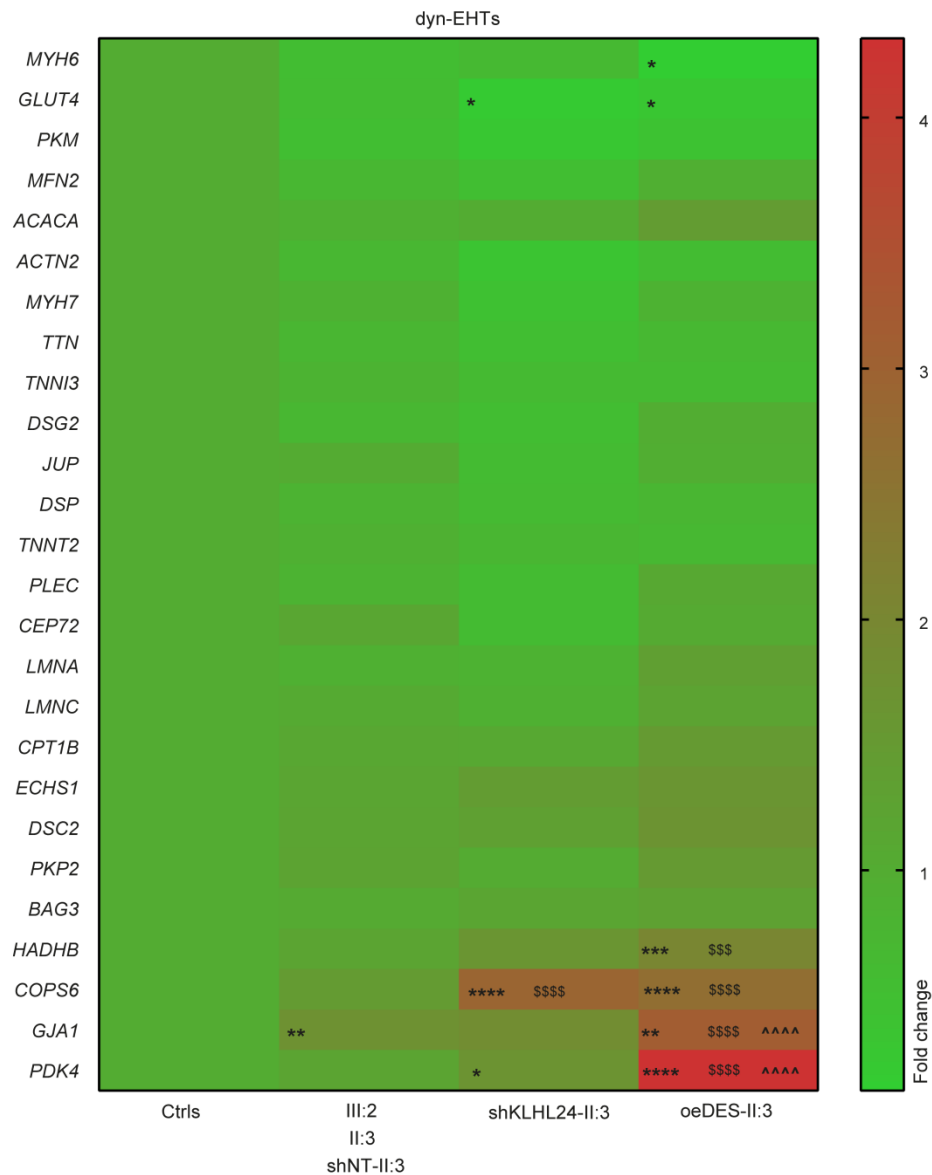

1

2 **Supplemental Figure 8: Heatmap of mRNA expression in dyn-EHTs**

3 Heatmap containing mRNA expression of genes related to desmosomal proteins, sarcomeric proteins, metabolic  
 4 enzymes and several desmin-related/binding proteins, measured in the different dyn-EHT groups. Statistical  
 5 analysis performed using 2-way ANOVA, corrected for multiple comparisons using FDR Benjamini and  
 6 Hochberg method. (\*p<0.05; \*\*p<0.01; \*\*\*p<0.001; \*\*\*\*p<0.0001 compared to Ctrl group); (\$\$\$p<0.001 ;  
 7 \$\$\$\$p<0.0001 compared to III:3; II:2; shNT group); (^^^p<0.0001 compared to shKLHL24 group). n=9 for  
 8 Ctrl group; n=18 for III:3; II:2; shNT-II:3 group; n=6 for shKLHL24-II:3 group; n=7 for oeDES-II:3 group.

9

| <b>Tabel S1: Immunolabeling</b>        |                                 |                         |                        |                     |
|----------------------------------------|---------------------------------|-------------------------|------------------------|---------------------|
| <b><u>Protein</u></b>                  | <b><u>Clone or Cat. no.</u></b> | <b><u>Clonality</u></b> | <b><u>Supplier</u></b> | <b><u>Usage</u></b> |
| Actin                                  | AC-15                           | monoclonal              | Merck                  | WB                  |
| a-Actinin                              | EA-53                           | monoclonal              | Sigma                  | WB                  |
| Actin                                  | Phalloidin-rodamine             | NA                      | Invitrogen             | IF                  |
| cardiac Troponin T                     | ab45932                         | polyclonal              | Abcam                  | IHC-P               |
| Connexin 43                            | 4E6.2                           | monoclonal              | Sigma                  | IF                  |
| Desmin (epitope before the C-terminus) | Y-20                            | polyclonal              | Santa Cruz             | WB, IF, IHC-P       |
| Desmin                                 | DE-R-11                         | monoclonal              | Abcam                  | IHC-P               |
| Desmin (raised against whole protein)  | RD301                           | monoclonal              | Santa Cruz             | IP                  |
| Desmin (C-terminus)                    | Y-66                            | Recombinant monoclonal  | Abcam                  | WB                  |
| Ubiquitin (all)                        | FK2                             | Monoclonal              | Merck                  | WB                  |
| Desmoglein 2                           | 10G11                           | monoclonal              | Progen                 | WB                  |
| Desmoplakin I&II                       | DP2.15                          | monoclonal              | Abcam                  | WB                  |
| Desmoplakin-I (ROD)                    | DP2.17                          | monoclonal              | Fitzgerald             | WB, IF              |
| FLAG-tag                               | M2                              | monoclonal              | Merck                  | WB, IP              |
| GAPDH                                  | 10R-G109a                       | monoclonal              | Fitzgerald             | WB                  |
| GSK3B (Ser9)                           | D3A4                            | monoclonal              | Cell signalling        | WB                  |
| HSP27                                  | G3.1                            | monoclonal              | Abcam                  | WB                  |
| KLHL24                                 | ab104089                        | polyclonal              | Abcam                  | IF                  |
| Lamin A/C                              | N18                             | polyclonal              | Santa Cruz             | WB                  |
| mtHSP70                                | JG1                             | monoclonal              | Thermo Fisher          | WB                  |
| OCT3/4                                 | H-134                           | polyclonal              | Santa Cruz             | IF                  |
| OXPPOS (I-V)                           | ab110413                        | moAb Cocktail           | Abcam                  | WB                  |
| -CI                                    | ab110242                        | monoclonal              | Abcam                  | WB                  |
| -CII                                   | ab14714                         | monoclonal              | Abcam                  | WB                  |
| -CIII                                  | ab14745                         | monoclonal              | Abcam                  | WB                  |
| -CIV                                   | ab14705                         | monoclonal              | Abcam                  | WB                  |
| -CV                                    | ab14748                         | monoclonal              | Abcam                  | WB                  |
| Plakoglobin                            | 15F11                           | monoclonal              | Abcam                  | WB, IF              |
| Plakophilin 2                          | PP2/62/86/150                   | monoclonal              | Progen                 | WB                  |
| Plectin                                | 10F6                            | monoclonal              | Santa Cruz             | WB                  |
| SSEA-4                                 | MC813                           | monoclonal              | Invitrogen             | IF                  |
| Vinculin                               | SPM227                          | monoclonal              | Abcam                  | WB                  |

| <b>Table S2: RT-PCR</b>     |                        |                        |
|-----------------------------|------------------------|------------------------|
| <b>Gene</b>                 | <b>Forward '5 - '3</b> | <b>Reverse '3 - '5</b> |
| <i>ACACA</i>                | AGAGGGAACATCCCTACGCT   | CGAAAAGAGACCATTCCGCC   |
| <i>ACTN2</i>                | AAGCACAAGCCACCCAAG     | GCAGCGTGTGGAAGTTGATCT  |
| <i>BAG3</i>                 | CCCATCGAGAAACTGCACCT   | CCACCTCTTTGCGGATCACT   |
| <i>CEP72</i>                | CGACTCCAAAGAGAGCGTCC   | CCACTCGCACTCTGCAATGA   |
| <i>COPS6</i>                | GTCCTCTACGACCGACAAGG   | CCAACCAGTGTGGTGCCTAA   |
| <i>CPT1B</i>                | CTCCTTTCCTTGCTGAGGTG   | TCTCGCTGCAATCATGTAG    |
| <i>DES</i>                  | CTGAGCAAAGGGGTTCTGAG   | ACTTCATGCTGCTGCTGTGT   |
| <i>DSC2</i>                 | CGGAGATTGTTGCGGTTGA    | GGAAAGACGTGCTGCTGTATCA |
| <i>DSG2</i>                 | TCCACTATGCCACCAACCAC   | GCTGGAGCATAACCCCTCTC   |
| <i>DSP</i>                  | CAGTGGTGTCCAGCGATGATGT | TGACGCTGGATATGGTGGAA   |
| <i>ECHS1</i>                | ATCTATGCCGGTGAGAAGGC   | GACAAGACCTGCTTGCTTGG   |
| <i>GAPDH</i>                | GCACCGTCAAGGCTGAGAAC   | GTGGTGAAGACGCCAGTGG    |
| <i>GJA1</i>                 | GGAATGCAAGAGAGGTTGAAAG | GGCATTGGAGAACTGGTAGA   |
| <i>GLUT4</i>                | TAGGCTCCGAAGATGGGGAA   | CCCAGCCACGTCTCATTGTA   |
| <i>HADHB</i>                | CCCAGCTGTCCAGACCAAAA   | TCCGATGCAACAAACCCGTA   |
| <i>JUP</i>                  | AGTAGCCACGATGGAGGTGA   | AGGTGTATGTCTGCTGCCAC   |
| <i>KLHL24</i>               | GACTAGGCCACGCAGGTC     | TCCAACCTCGCTCACATCCTC  |
| <i>KLHL24-tr6-1453-1711</i> | ATGCAGTCTGTGCTCTAAGG   | CCATCATAGCCACCGACAAG   |
| <i>KLHL24-tr6-1692-1827</i> | GTTGTGCGTGGCTATGATGG   | GTTTGCCTACACAGCTAGTC   |
| <i>LMNA</i>                 | GCTCTTCTGCCTCCAGTGTC   | ACATGATGCTGCAGTTCTGG   |
| <i>LMNB</i>                 | CTCAGTGACTGTGGTTGAGGA  | AGTGCAGGCTCGGCCTC      |
| <i>MFN2</i>                 | ATGCATCCCCACTTAAGCAC   | CCAGAGGGCAGAACTTTGTC   |
| <i>MYH6</i>                 | GATAGAGAGACTCCTGCGGC   | TCGGTCATCTTGGTGTCTCC   |
| <i>MYH7</i>                 | CGAAGGGCTTGAATGAGGAGT  | TCCTCCCAAGGAGCTGTTAC   |
| <i>PDK4</i>                 | CCTTTGGCTGGTTTTGGTTA   | CCTGCTTGGGATACACCAGT   |
| <i>PKM</i>                  | GTGGGGCCATAATCGTCCTC   | GACGAGCTGTCTGGGGATTC   |
| <i>PKP2</i>                 | GCAAATGGTTTGCTCGATTT   | GGCTGGTAATCTGCAATGGT   |
| <i>PLEC</i>                 | GCGCCTACTCCAAGTACCTC   | GCTGTAGTAGCCCTTGGTGG   |
| <i>PPIA</i>                 | ACTTCACACGCCATAATG     | ACCCGTATGCTTTAGGAT     |
| <i>TNNI3</i>                | CCAACTACCGCGCTTATGC    | CTCGCTCCAGCTCTTGCTTT   |
| <i>TNNT2</i>                | TGGAGGCAGAGAAGTTCGAC   | CCTGTTTCGGAGAACATTGAT  |
| <i>TTN</i>                  | CGTCAGAACCTCACGGTCAA   | GGGGCGGGGTTTCATCTTTA   |

1
